# Supplementary material for: An exact inversion method for extracting orientation ordering by small-angle scattering
Source: Royal Society of Chemistry journal article supplement (doi:10.1039/d0cp05886f), 2021-01-01
Supplement: d0cp05886f4.pdf [file d0cp05886f4.pdf]

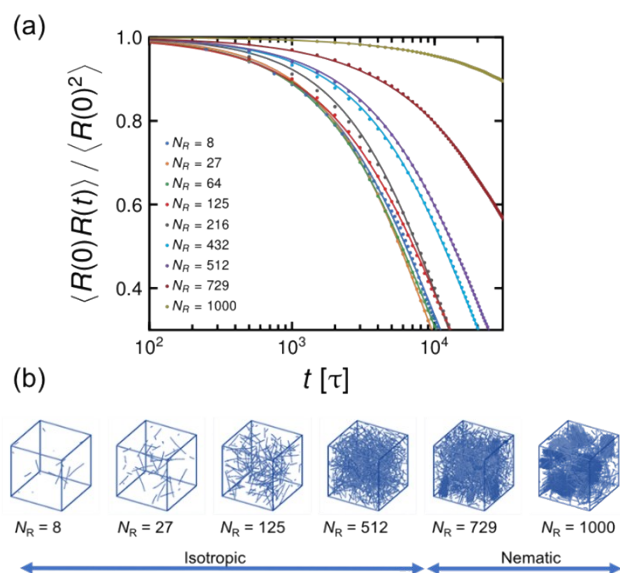

**Figure A3.** End-to-end vector autocorrelation function,  $\frac{\langle \vec{R}(0) \cdot \vec{R}(t) \rangle}{\langle R^2(0) \rangle}$  (a) and snapshots of simulations at different rod
