# Supplementary figures and images for: An exact inversion method for extracting orientation ordering by small-angle scattering
Source: Royal Society of Chemistry journal article supplement (doi:10.1039/d0cp05886f), 2021-01-01

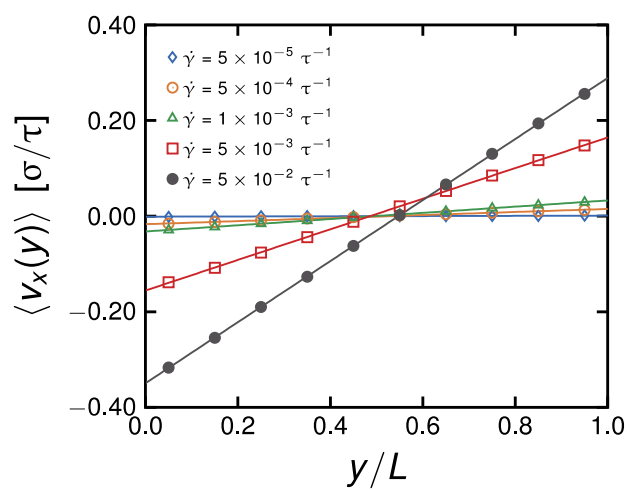

**Figure A4.** Velocity profile of  $N_R=216$  system at different shear rates.

Supplement: d0cp05886f5.pdf [file d0cp05886f5.pdf]
